# Supplementary material for: Investigations on oil detachment from rough surfaces in an aqueous solution
Source: Royal Society of Chemistry journal article supplement (doi:10.1039/c7ra04766e), 2017-01-01
Supplement: c7ra04766e1.pdf [file c7ra04766e1.pdf]

# **Investigations on the oil detachment on rough surface in aqueous solution**

*W. K. Xie, Y. Z. Sun, H. T. Liu\*, and F.H. Zhang*

*Center for Precision Engineering, Harbin Institute of Technology, P.O. Box 413,  
Harbin, Heilongjiang 150001, China*

## **\*Corresponding author**

Haitao Liu

*Center for Precision Engineering,*

*Harbin Institute of Technology, P.O. Box 413,*

*Harbin, Heilongjiang 150001,*

*China*

E-mail: 12B908026@hit.edu.cn

Tel. +86-451-86413840

Fax: +86-451-86415244

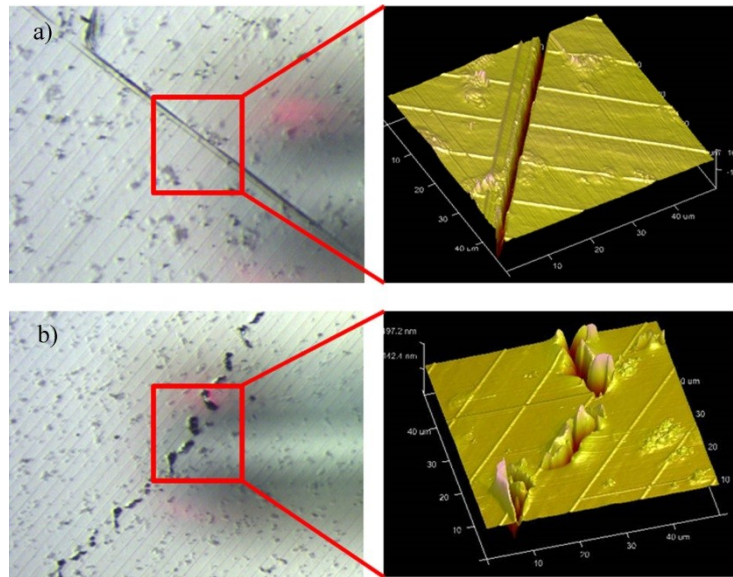

**Fig.S1** Typical defects on the machined alumina surface: a) scratch, b) pit and protrusion.
